# Supplementary material for: Enhancing SNV identification in whole-genome sequencing data through the incorporation of known genetic variants into the minimap2 index
Source: Springer Nature journal article supplement (doi:10.1186/s12859-024-05862-y), 2024-07-13
Supplement: 12859_2024_5862_MOESM1_ESM.pdf [file 12859_2024_5862_MOESM1_ESM.pdf]

# Supplementary Material

## 1. Supplementary Results

**Supplementary Table 1.** Results of the allele frequency selection experiment for genetic variants from the 1000 Genomes Project.

| Tool                | Minimap2 with modified index (VCF from 1000 Genomes Project) |            |            |            |            |
|---------------------|--------------------------------------------------------------|------------|------------|------------|------------|
| Allele frequency    | 0.5                                                          | 0.2        | 0.05       | 0.02       | 0.005      |
| SNVs in index       | 1932068                                                      | 4368844    | 7609482    | 10254402   | 16695721   |
| Indels in index     | 338296                                                       | 757897     | 1193661    | 1481299    | 2080783    |
| k-mer and window    | k 21, w 11                                                   |            |            |            |            |
| Minimizers in index | 491422780                                                    | 499880055  | 511183729  | 520391349  | 542783669  |
| Parameter f         | 1014, 5075                                                   | 1033, 5148 | 1055, 5223 | 1073, 5286 | 1116, 5458 |
| <b>SNVs</b>         |                                                              |            |            |            |            |
| TP                  | 3331654                                                      | 3332986    | 3333360    | 3333388    | 3333296    |
| FN                  | 21032                                                        | 19700      | 19326      | 19298      | 19390      |
| FP                  | 14945                                                        | 14485      | 14379      | 14427      | 14580      |
| Recall              | 0.99373                                                      | 0.99412    | 0.99424    | 0.99424    | 0.99422    |
| Precision           | 0.99553                                                      | 0.99567    | 0.99570    | 0.99569    | 0.99565    |
| F1-Score            | 0.99463                                                      | 0.99490    | 0.99497    | 0.99497    | 0.99493    |
| <b>Indels</b>       |                                                              |            |            |            |            |
| TP                  | 518314                                                       | 518365     | 518381     | 518383     | 518388     |
| FN                  | 4076                                                         | 4025       | 4009       | 4007       | 4002       |
| FP                  | 2936                                                         | 2905       | 2896       | 2886       | 2900       |
| Recall              | 0.99220                                                      | 0.99230    | 0.99233    | 0.99233    | 0.99234    |
| Precision           | 0.99437                                                      | 0.99443    | 0.99445    | 0.99447    | 0.99444    |
| F1-Score            | 0.99328                                                      | 0.99336    | 0.99339    | 0.99340    | 0.99339    |

**Supplementary Table 2.** The results derived from the minimap2 tool encompassed the quantification of multi-mapped reads and aligned reads based on MAPQ metrics exceeding thresholds of 10, 30, and 50. Across all experimental runs, the use of the modified index consistently yielded a decrease in the number of multi-mapped reads.

| k-mer and window sizes | MAPQ          | % mapped reads with certain MAPQ |                                                              |                                              |
|------------------------|---------------|----------------------------------|--------------------------------------------------------------|----------------------------------------------|
|                        |               | Minimap2 with default index      | Minimap2 with modified index (VCF from 1000 Genomes Project) | Minimap2 with modified index (VCF from HPRC) |
| k 15, w 8              | 0 (multi-map) | 2.635                            | 2.634                                                        | 2.606                                        |
|                        | >= 10         | 92.128                           | 92.154                                                       | 91.782                                       |
|                        | >= 30         | 90.090                           | 90.144                                                       | 89.903                                       |
|                        | >= 50         | 87.901                           | 87.982                                                       | 87.796                                       |
| k 21, w 11             | 0 (multi-map) | 2.848                            | 2.829                                                        | 2.800                                        |
|                        | >= 10         | 92.120                           | 92.152                                                       | 91.773                                       |
|                        | >= 30         | 90.614                           | 90.663                                                       | 90.389                                       |
|                        | >= 50         | 88.830                           | 88.913                                                       | 88.708                                       |
| k 27, w 14             | 0 (multi-map) | 3.228                            | 3.207                                                        | 3.161                                        |
|                        | >= 10         | 91.671                           | 91.717                                                       | 91.347                                       |
|                        | >= 30         | 90.328                           | 90.392                                                       | 90.093                                       |
|                        | >= 50         | 88.597                           | 88.688                                                       | 88.464                                       |

**Supplementary Table 3.** The evaluation of the acquired VCF files against the reference was performed within "confident regions", utilizing HG002 raw reads and reference data sourced from PrecisionFDA Truth Challenge V2 aligned to the linear reference sequence GRCh38 (GCA\_000001405.15).

| Tool                | Minimap2 with default index |             |             | Minimap2 with modified index (VCF from 1000 Genomes Project) |             |             | Minimap2 with modified index (VCF from HPRC) |             |            | Bowtie 2    | BWA-MEM     | BWA-MEM2    |
|---------------------|-----------------------------|-------------|-------------|--------------------------------------------------------------|-------------|-------------|----------------------------------------------|-------------|------------|-------------|-------------|-------------|
|                     |                             |             |             |                                                              |             |             |                                              |             |            |             |             |             |
| SNVs in index       | -                           | -           | -           | 6833788                                                      |             |             | 20689457                                     |             |            | -           | -           | -           |
| Indels in index     | -                           | -           | -           | 843004                                                       |             |             | 7445607                                      |             |            | -           | -           | -           |
| k-mer and window    | k 15, w 8                   | k 21, w 11  | k 27, w 14  | k 15, w 8                                                    | k 21, w 11  | k 27, w 14  | k 15, w 8                                    | k 21, w 11  | k 27, w 14 | -           | -           | -           |
| Parameter f         | 1033, 7368                  | 1000, 5000  | 607, 3621   | 1072, 7528                                                   | 1044, 5195  | 633, 3791   | 1141, 7590                                   | 1127, 5578  | 683, 4098  | -           | -           | -           |
| Minimizers in index | 673735728                   | 490565423   | 393318372   | 698666370                                                    | 515149313   | 418775210   | 743375725                                    | 561644550   | 466504645  | -           | -           | -           |
| Run time            | 96m 26.489s                 | 45m 52.717s | 31m 48.354s | 86m 29.813s                                                  | 46m 59.489s | 31m 56.325s | 125m 58.7s                                   | 56m 29.470s | 37m 7.072s | 86m 16.386s | 31m 35.646s | 21m 29.554s |
| <b>SNVs</b>         |                             |             |             |                                                              |             |             |                                              |             |            |             |             |             |
| TP                  | 3330615                     | 3334220     | 3334076     | 3332000                                                      | 3335444     | 3336158     | 3338509                                      | 3342362     | 3343575    | 3248777     | 3239702     | 3339366     |
| FN                  | 34512                       | 30907       | 31051       | 33127                                                        | 29683       | 28969       | 26618                                        | 22765       | 21552      | 116350      | 125425      | 25761       |
| FP                  | 21526                       | 20761       | 17957       | 21488                                                        | 20665       | 17757       | 18446                                        | 17092       | 14248      | 12977       | 24485       | 36201       |
| Recall              | 0.98974                     | 0.99082     | 0.99077     | 0.99016                                                      | 0.99118     | 0.99139     | 0.99209                                      | 0.99324     | 0.99360    | 0.96543     | 0.96273     | 0.99235     |
| Precision           | 0.99358                     | 0.99381     | 0.99464     | 0.99359                                                      | 0.99384     | 0.99471     | 0.99451                                      | 0.99491     | 0.99576    | 0.99602     | 0.99250     | 0.98928     |
| F1-Score            | 0.99166                     | 0.99231     | 0.99270     | 0.99187                                                      | 0.99251     | 0.99304     | 0.99330                                      | 0.99407     | 0.99468    | 0.98048     | 0.97739     | 0.99081     |
| <b>Indels</b>       |                             |             |             |                                                              |             |             |                                              |             |            |             |             |             |
| TP                  | 520316                      | 520264      | 520452      | 520314                                                       | 520487      | 520527      | 520454                                       | 520612      | 520657     | 514138      | 499040      | 520384      |
| FN                  | 5153                        | 5205        | 5017        | 5155                                                         | 4982        | 4942        | 5015                                         | 4857        | 4812       | 11331       | 26429       | 5085        |
| FP                  | 4311                        | 4318        | 3705        | 4320                                                         | 4112        | 3678        | 4031                                         | 3759        | 3391       | 3212        | 10668       | 5454        |
| Recall              | 0.99019                     | 0.99001     | 0.99045     | 0.99019                                                      | 0.99052     | 0.99060     | 0.99046                                      | 0.99076     | 0.99084    | 0.97844     | 0.94970     | 0.99032     |
| Precision           | 0.99179                     | 0.99178     | 0.99293     | 0.99177                                                      | 0.99217     | 0.99299     | 0.99232                                      | 0.99284     | 0.99353    | 0.99379     | 0.97908     | 0.98963     |
| F1-Score            | 0.99099                     | 0.99093     | 0.99169     | 0.99098                                                      | 0.99134     | 0.99179     | 0.99139                                      | 0.99180     | 0.99219    | 0.98606     | 0.96417     | 0.98998     |

**Supplementary Table 4.** The assessment of the generated VCF files against the reference was performed by utilizing HG002 raw reads and reference data sourced from PrecisionFDA Truth Challenge, aligned to the linear reference sequence GRCh19 (hs37d5).

| Tool                | Minimap2 with default index |             |             | Minimap2 with modified index<br>(VCF from 1000 Genomes Project) |             |             | Minimap2 with modified index<br>(VCF from HPRC) |             |             | Bowtie 2   | BWA-MEM     | BWA-MEM2    |
|---------------------|-----------------------------|-------------|-------------|-----------------------------------------------------------------|-------------|-------------|-------------------------------------------------|-------------|-------------|------------|-------------|-------------|
| SNVs in index       | –                           | –           | –           | 7609482                                                         |             |             | 20405885                                        |             |             | –          | –           | –           |
| Indels in index     | –                           | –           | –           | 1193661                                                         |             |             | 7355511                                         |             |             | –          | –           | –           |
| k-mer and window    | k 15, w 8                   | k 21, w 11  | k 27, w 14  | k 15, w 8                                                       | k 21, w 11  | k 27, w 14  | k 15, w 8                                       | k 21, w 11  | k 27, w 14  | –          | –           | –           |
| Parameter f         | 1374, 6868                  | 1000, 5000  | 802, 4009   | 1436, 6898                                                      | 1055, 5223  | 858, 4232   | 1544, 7507                                      | 1157, 5654  | 954, 4669   | –          | –           | –           |
| Minimizers in index | 665931402                   | 484793717   | 388675338   | 691683015                                                       | 511183729   | 416000320   | 734629788                                       | 554938084   | 460920498   | –          | –           | –           |
| Run time            | 81m 19.394s                 | 44m 30.907s | 41m 32.402s | 76m 50.408s                                                     | 46m 52.459s | 41m 50.795s | 73m 29.620s                                     | 45m 37.125s | 42m 32.402s | 124m 36.9s | 36m 35.207s | 28m 25.637s |
| <b>SNVs</b>         |                             |             |             |                                                                 |             |             |                                                 |             |             |            |             |             |
| TP                  | 3328366                     | 3330532     | 3330391     | 3331282                                                         | 3333360     | 334145      | 3334576                                         | 3336872     | 3337920     | 3352686    | 3247634     | 3333551     |
| FN                  | 24320                       | 22154       | 22295       | 21404                                                           | 19326       | 18541       | 18110                                           | 15814       | 14766       | 112964     | 105052      | 19135       |
| FP                  | 17079                       | 15809       | 15921       | 15897                                                           | 14377       | 14289       | 15602                                           | 13790       | 13708       | 42316      | 9749        | 21324       |
| Recall              | 0.99275                     | 0.99339     | 0.99335     | 0.99361                                                         | 0.994236    | 0.9945      | 0.9946                                          | 0.99528     | 0.99560     | 0.96631    | 0.96867     | 0.99429     |
| Precision           | 0.99489                     | 0.99528     | 0.99524     | 0.99525                                                         | 0.99571     | 0.99573     | 0.99534                                         | 0.99588     | 0.99591     | 0.98711    | 0.99701     | 0.99364     |
| F1-Score            | 0.99382                     | 0.99433     | 0.9943      | 0.99443                                                         | 0.99497     | 0.9951      | 0.99497                                         | 0.99558     | 0.99575     | 0.97660    | 0.98263     | 0.99397     |
| <b>Indels</b>       |                             |             |             |                                                                 |             |             |                                                 |             |             |            |             |             |
| TP                  | 518288                      | 518267      | 518306      | 518376                                                          | 518381      | 518465      | 518431                                          | 518413      | 518493      | 511668     | 503488      | 518270      |
| FN                  | 4102                        | 4123        | 4084        | 4014                                                            | 4009        | 3925        | 3959                                            | 3977        | 3897        | 10722      | 18902       | 4120        |
| FP                  | 2948                        | 3008        | 2957        | 2843                                                            | 2896        | 2840        | 2760                                            | 1783        | 2704        | 5198       | 7251        | 3226        |
| Recall              | 0.99215                     | 0.99211     | 0.99218     | 0.99232                                                         | 0.99233     | 0.99249     | 0.99242                                         | 0.99238     | 0.99254     | 0.97948    | 0.96382     | 0.99211     |
| Precision           | 0.99435                     | 0.99423     | 0.99433     | 0.99455                                                         | 0.99445     | 0.99456     | 0.99471                                         | 0.99475     | 0.99481     | 0.98995    | 0.98581     | 0.99382     |
| F1-Score            | 0.99325                     | 0.99317     | 0.99326     | 0.99343                                                         | 0.99339     | 0.99352     | 0.99356                                         | 0.99357     | 0.99368     | 0.98468    | 0.97469     | 0.99296     |

**Supplementary Table 5.** The assessment of the generated VCF files against the reference was performed by utilizing HG002 reference data from the PrecisionFDA Truth Challenge, aligned to the linear reference sequence hs37d5. Synthetic reads generated by HG002 benchmark VCF file using ART toolset.

| Reference     | Chromosome 1                |                                                              |                                              | Chromosome 6                |                                                              |                                              |
|---------------|-----------------------------|--------------------------------------------------------------|----------------------------------------------|-----------------------------|--------------------------------------------------------------|----------------------------------------------|
| Tool          | Minimap2 with default index | Minimap2 with modified index (VCF from 1000 Genomes Project) | Minimap2 with modified index (VCF from HPRC) | Minimap2 with default index | Minimap2 with modified index (VCF from 1000 Genomes Project) | Minimap2 with modified index (VCF from HPRC) |
| <b>SNVs</b>   |                             |                                                              |                                              |                             |                                                              |                                              |
| TP            | 236673                      | 236915                                                       | 236945                                       | 183613                      | 183886                                                       | 183926                                       |
| FN            | 1215                        | 973                                                          | 943                                          | 1167                        | 894                                                          | 854                                          |
| FP            | 2434                        | 2438                                                         | 2456                                         | 3005                        | 2992                                                         | 3016                                         |
| Recall        | 0.99389                     | 0.99591                                                      | 0.99604                                      | 0.99368                     | 0.99516                                                      | 0.99538                                      |
| Precision     | 0.98982                     | 0.98981                                                      | 0.98974                                      | 0.98390                     | 0.98399                                                      | 0.98387                                      |
| F1-Score      | 0.99235                     | 0.99285                                                      | 0.99288                                      | 0.98877                     | 0.98954                                                      | 0.98959                                      |
| <b>Indels</b> |                             |                                                              |                                              |                             |                                                              |                                              |
| TP            | 24092                       | 24097                                                        | 24093                                        | 19537                       | 19538                                                        | 19536                                        |
| FN            | 1985                        | 1980                                                         | 1984                                         | 1413                        | 1412                                                         | 1414                                         |
| FP            | 2857                        | 2847                                                         | 2847                                         | 2160                        | 2154                                                         | 2151                                         |
| Recall        | 0.92388                     | 0.92407                                                      | 0.92392                                      | 0.93255                     | 0.93260                                                      | 0.93251                                      |
| Precision     | 0.89391                     | 0.89426                                                      | 0.89424                                      | 0.90040                     | 0.90066                                                      | 0.90077                                      |
| F1-Score      | 0.90865                     | 0.90892                                                      | 0.90884                                      | 0.91620                     | 0.91635                                                      | 0.91636                                      |

**Supplementary Table 6.** The evaluation of the acquired VCF files against the reference was performed within "confident regions", utilizing HG002 raw reads and reference data sourced from PrecisionFDA Truth Challenge V2 aligned to the linear reference sequence GRCh38 (GCA\_000001405.15). Index modified with the addition of population-specific mutations from gnomAD v3.1.2.

| Added population    | Ashkenazi Jewish | East Asian  | Admixed American |
|---------------------|------------------|-------------|------------------|
| SNVs in index       | 311393           | 487442      | 158018           |
| Indels in index     | 140140           | 200459      | 62070            |
| k-mer and window    | k27, w14         |             |                  |
| Parameter f         | 609, 3630        | 609, 3636   | 607, 3626        |
| Minimizers in index | 393913199        | 394503637   | 395195323        |
| Run time            | 36m 7.888s       | 35m 58.938s | 41m 13.455s      |
| <b>SNVs</b>         |                  |             |                  |
| TP                  | 3334248          | 3334143     | 3334087          |
| FN                  | 30879            | 30984       | 31040            |
| FP                  | 18235            | 18596       | 18244            |
| Recall              | 0.99082          | 0.99079     | 0.99078          |
| Precision           | 0.99456          | 0.99445     | 0.99456          |
| F1-Score            | 0.99269          | 0.99262     | 0.99266          |
| <b>Indels</b>       |                  |             |                  |
| TP                  | 520451           | 520441      | 520455           |
| FN                  | 5018             | 5028        | 5014             |
| FP                  | 3729             | 3765        | 3715             |
| Recall              | 0.99045          | 0.99043     | 0.99046          |
| Precision           | 0.99289          | 0.99282     | 0.99291          |
| F1-Score            | 0.99167          | 0.99163     | 0.99169          |

**Supplementary Figure 1-2.** The genetic variants found using the modified index. There are 1 SNV (chr1: 58,273,219) and 1 deletion (chr1: 58,273,237).

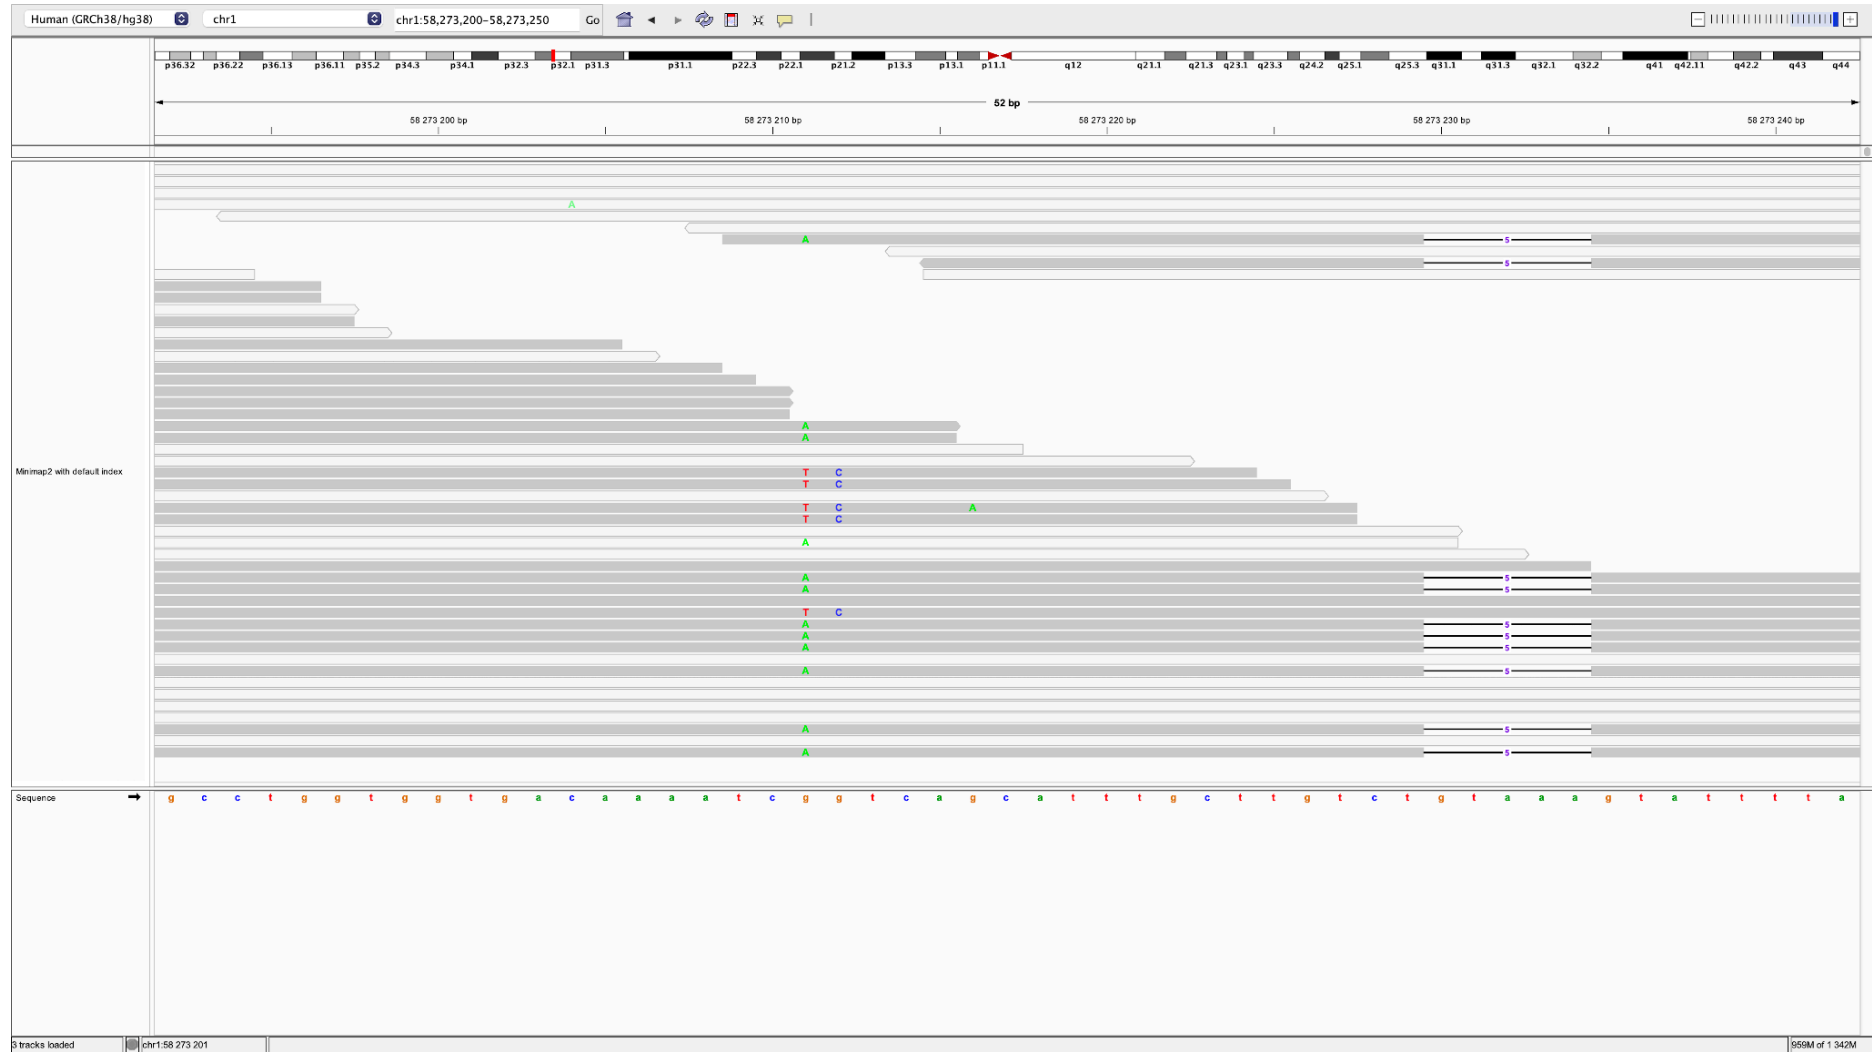

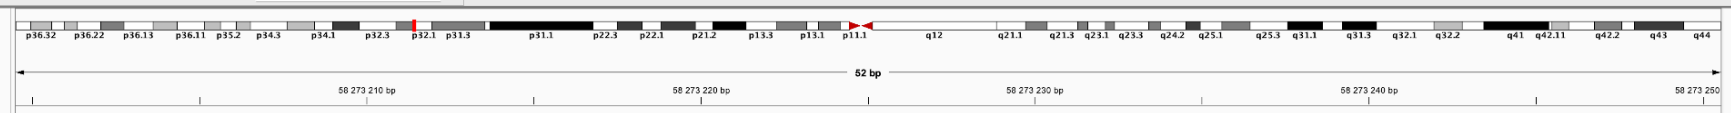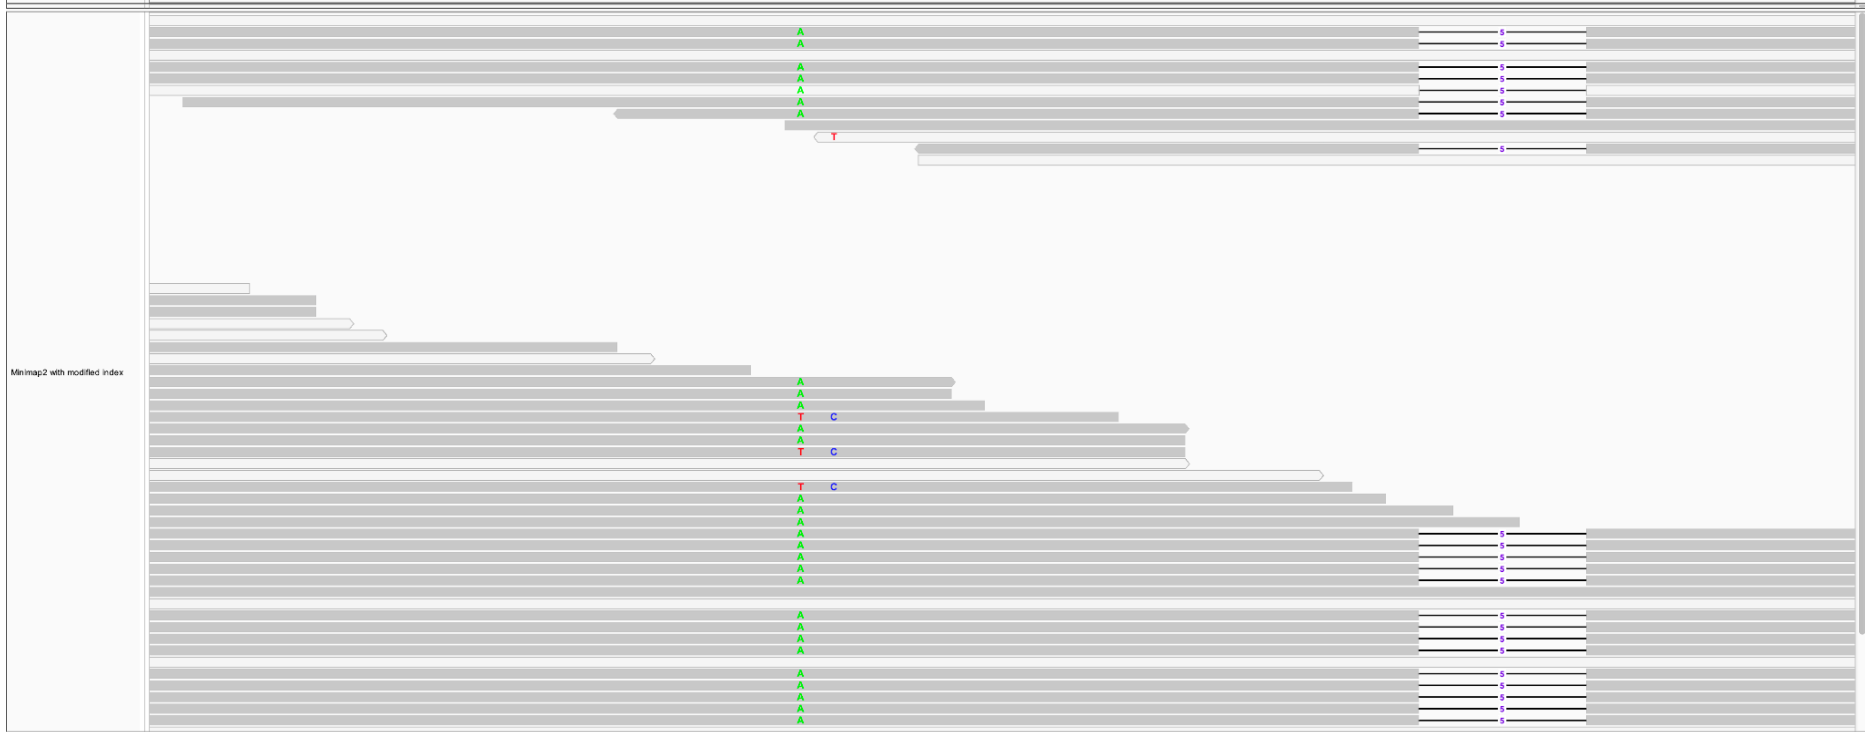

Sequence → g c c t g g t g g t g a c a a a a t c g g t c a g c a t t t g c t t g t c t g t a a a g t a t t t t a



## Supplementary methods

### 1.Data

#### 1.1 Sequencing data in FASTQ format

(HG002 35x)

<https://precision.fda.gov/home/files/file-FpZG9Jj0xbJy0QXjB7yb6fpX-1>

<https://precision.fda.gov/home/files/file-FpZG9Jj0xbJfGb01qBgKyg1-1>

(HG002 50x)

<https://precision.fda.gov/home/files/file-BvP0b3Q0Z8pJfQxYxbk8P2p0>

<https://precision.fda.gov/home/files/file-BvP0f600xKVyPQZj08ZjXPx4>

#### 1.2 Benchmark variant calls in VCF file

(HG002 GRCh38 v4.2.1)

[https://ftp-trace.ncbi.nlm.nih.gov/giab/ftp/release/AshkenazimTrio/HG002\\_NA24385\\_son/NISTv4.2.1/GRCh38/HG002\\_GRCh38\\_1\\_22\\_v4.2.1\\_benchmark.vcf.gz](https://ftp-trace.ncbi.nlm.nih.gov/giab/ftp/release/AshkenazimTrio/HG002_NA24385_son/NISTv4.2.1/GRCh38/HG002_GRCh38_1_22_v4.2.1_benchmark.vcf.gz)

[https://ftp-trace.ncbi.nlm.nih.gov/giab/ftp/release/AshkenazimTrio/HG002\\_NA24385\\_son/NISTv4.2.1/GRCh38/HG002\\_GRCh38\\_1\\_22\\_v4.2.1\\_benchmark.vcf.gz.tbi](https://ftp-trace.ncbi.nlm.nih.gov/giab/ftp/release/AshkenazimTrio/HG002_NA24385_son/NISTv4.2.1/GRCh38/HG002_GRCh38_1_22_v4.2.1_benchmark.vcf.gz.tbi)

(HG002 GRCh37 v4.2.1)

[https://ftp-trace.ncbi.nlm.nih.gov/giab/ftp/release/AshkenazimTrio/HG002\\_NA24385\\_son/NISTv4.2.1/GRCh37/HG002\\_GRCh37\\_1\\_22\\_v4.2.1\\_benchmark.vcf.gz](https://ftp-trace.ncbi.nlm.nih.gov/giab/ftp/release/AshkenazimTrio/HG002_NA24385_son/NISTv4.2.1/GRCh37/HG002_GRCh37_1_22_v4.2.1_benchmark.vcf.gz)

[https://ftp-trace.ncbi.nlm.nih.gov/giab/ftp/release/AshkenazimTrio/HG002\\_NA24385\\_son/NISTv4.2.1/GRCh37/HG002\\_GRCh37\\_1\\_22\\_v4.2.1\\_benchmark.vcf.gz.tbi](https://ftp-trace.ncbi.nlm.nih.gov/giab/ftp/release/AshkenazimTrio/HG002_NA24385_son/NISTv4.2.1/GRCh37/HG002_GRCh37_1_22_v4.2.1_benchmark.vcf.gz.tbi)

#### 1.3 Confident regions in BED file

(HG002 GRCh38 v4.2.1)

[https://ftp-trace.ncbi.nlm.nih.gov/giab/ftp/release/AshkenazimTrio/HG002\\_NA24385\\_son/NISTv4.2.1/GRCh38/HG002\\_GRCh38\\_1\\_22\\_v4.2.1\\_benchmark\\_noinconsistent.bed](https://ftp-trace.ncbi.nlm.nih.gov/giab/ftp/release/AshkenazimTrio/HG002_NA24385_son/NISTv4.2.1/GRCh38/HG002_GRCh38_1_22_v4.2.1_benchmark_noinconsistent.bed)

(HG002 GRCh37 v4.2.1)

[https://ftp-trace.ncbi.nlm.nih.gov/giab/ftp/release/AshkenazimTrio/HG002\\_NA24385\\_son/NISTv4.2.1/GRCh37/HG002\\_GRCh37\\_1\\_22\\_v4.2.1\\_benchmark\\_noinconsistent.bed](https://ftp-trace.ncbi.nlm.nih.gov/giab/ftp/release/AshkenazimTrio/HG002_NA24385_son/NISTv4.2.1/GRCh37/HG002_GRCh37_1_22_v4.2.1_benchmark_noinconsistent.bed)

#### 1.4 1000 Genomes Project phase 3 VCF files

(GRCh38)

Downloaded from:

<ftp://hgdownload.soe.ucsc.edu/gbdb/hg38/1000Genomes/>

(GRCh37)

Downloaded from:

<http://hgdownload.cse.ucsc.edu/gbdb/hg19/1000Genomes/phase3/>

## 1.5 HPRC v1.1 VCF file

Downloaded from:

<https://s3-us-west-2.amazonaws.com/human-pangenomics/pangenomes/freeze/freeze1/minigraph-cactus/hprc-v1.1-mc-grch38/hprc-v1.1-mc-grch38.vcfbub.a100k.wave.vcf.gz>

<https://s3-us-west-2.amazonaws.com/human-pangenomics/pangenomes/freeze/freeze1/minigraph-cactus/hprc-v1.1-mc-grch38/hprc-v1.1-mc-grch38.vcfbub.a100k.wave.vcf.gz.tbi>

## 1.6 gnomAD v3.1.2 VCF files (GRCh38)

Downloaded from:

<https://storage.googleapis.com/gcp-public-data--gnomad/release/3.1.2/vcf/genomes/>

## 1.7 Additional files for Base Quality Score Recalibrator

(GRCh38)

[ftp://gsapubftp-anonymous@ftp.broadinstitute.org/bundle/hg38/dbsnp\\_138.hg38.vcf.gz](ftp://gsapubftp-anonymous@ftp.broadinstitute.org/bundle/hg38/dbsnp_138.hg38.vcf.gz)

[ftp://gsapubftp-anonymous@ftp.broadinstitute.org/bundle/hg38/dbsnp\\_138.hg38.vcf.gz.tbi](ftp://gsapubftp-anonymous@ftp.broadinstitute.org/bundle/hg38/dbsnp_138.hg38.vcf.gz.tbi)

[ftp://gsapubftp-anonymous@ftp.broadinstitute.org/bundle/hg38/Mills\\_and\\_1000G\\_gold\\_standard.indels.hg38.vcf.gz](ftp://gsapubftp-anonymous@ftp.broadinstitute.org/bundle/hg38/Mills_and_1000G_gold_standard.indels.hg38.vcf.gz)

[ftp://gsapubftp-anonymous@ftp.broadinstitute.org/bundle/hg38/Mills\\_and\\_1000G\\_gold\\_standard.indels.hg38.vcf.gz.tbi](ftp://gsapubftp-anonymous@ftp.broadinstitute.org/bundle/hg38/Mills_and_1000G_gold_standard.indels.hg38.vcf.gz.tbi)

(GRCh37)

[ftp://gsapubftp-anonymous@ftp.broadinstitute.org/bundle/b37/dbsnp\\_138.b37.vcf.gz](ftp://gsapubftp-anonymous@ftp.broadinstitute.org/bundle/b37/dbsnp_138.b37.vcf.gz)

[ftp://gsapubftp-anonymous@ftp.broadinstitute.org/bundle/b37/Mills\\_and\\_1000G\\_gold\\_standard.indels.b37.vcf.gz](ftp://gsapubftp-anonymous@ftp.broadinstitute.org/bundle/b37/Mills_and_1000G_gold_standard.indels.b37.vcf.gz)

## 2. Commands

### 2.1 Command for trimming using cutadapt v1.18

```
cutadapt -q 0,0 --minimum-length 60 -a AGATCGGAAGAGCACACGTCTGAACTCCAGTCA -A AGATCGGAAGAGCGTCGTGTAGGGAAAGAGTGT --pair-filter=any -o $output_fastq_file1 -p $output_fastq_file2 $input_fastq_file1 $input_fastq_file2
```

### 2.2 Command for minimap2 index creation using minimap2\_index\_modifier (minimap2 v2.24)

```
minimap2 -d $output_index -k $k -w $w --vcf-file-with-variants $input_vcf [--parse-haplotype] $ref_fasta
```

### 2.3 Commands for read alignment with minimap2 (minimap2 v2.24)

```
minimap2 -a -Y -f $n,$m -x sr -R '@RG\tID:HG002\tSM:HG002\tPL:ILLUMINA' $modified_index $trimmed_fastq1 $trimmed_fastq2 > $output_intermediate_bam
```

### 2.4 Commands for BWA-MEM index creation (BWA-MEM v0.7.17)

```
bwa index $ref_fasta
```

### 2.5 Commands for read alignment with BWA-MEM (BWA-MEM v0.7.17)

```
bwa mem -K 100000000 -p -v 3 -Y -R '@RG\tID:HG002\tSM:HG002\tPL:ILLUMINA' \ $ref_fasta $trimmed_fastq1 $trimmed_fastq2 > $output_intermediate_bam
```

## 2.6 Commands for BWA-MEM 2 index creation (BWA-MEM 2 v2.2.1)

```
bwa-mem2 index $ref_fasta
```

## 2.7 Commands for read alignment with BWA-MEM 2 (BWA-MEM 2 v2.2.1)

```
bwa-mem2 -K 100000000 -v 3 -Y -R '@RG\tID:HG002\tSM:HG002\tPL:Illumina' \  
$ref_fasta $trimmed_fastq1 $trimmed_fastq2 > $output_intermediate_bam
```

## 2.8 Commands for Bowtie2 index creation (Bowtie 2 v2.5.2)

```
bowtie2-build $ref_fasta $ref_fasta_name
```

## 2.9 Commands for read alignment with Bowtie 2 (Bowtie 2 v2.5.2)

```
bowtie2 -x $index_basename --rg-id @RG\tID:HG002 --rg SM:HG002 --rg PL:BGI \  
-1 $trimmed_fastq1 -2 $trimmed_fastq2 > $output_intermediate_bam
```

## 2.10 Command for BAM duplicate removal, sorting, and indexing (samtools v1.18)

```
samtools fixmate -m -O SAM $output_intermediate_bam - | samtools sort - | samtools markdup -d 100 - $output_bam  
samtools index $output_bam $output_bam_index
```

## 2.11 Command for Base Quality Score Recalibration (GATK v4.2.6.1, samtools v1.18)

```
gatk BaseRecalibrator \  
-R $ref_fasta \  
-I $input_bam \  
--read-index $input_bam_index \  
--use-original-qualities \  
-O $report_file \  
--known-sites $dbSNP \  
--known-sites $mills_and_1000g  
gatk ApplyBQSR \  
--add-output-sam-program-record \  
-R $ref_fasta \  
-I $input_bam \  
--read-index $input_bam_index \  
--use-original-qualities \  
-O $output_recalibrated_bam \  
-bqsr $report_file \  
--static-quantized-quals 10 \  
--static-quantized-quals 20 \  
--static-quantized-quals 30
```

```
samtools index $output_recalibrated_bam $output_bam_recalibrated_index
```

## 2.12 Command for variant calling (GATK v4.2.6.1)

```
gatk HaplotypeCaller \  
-R $ref_fasta \  
-I $input_recalibrated_bam \  
--read-index $input_recalibrated_bam_index \  
-O $output_vcf \  
-contamination 0 \  
--native-pair-hmm-threads 1
```

## 2.13 Command for VCF files comparison (hap.py v0.3.15)

```
hap.py $benchmark_vcf $result_vcf -f $confident_regions_bed -r $ref_fasta \  
-V --engine=vcfEval --no-leftshift --no-decompose --gender=none
```

## 2.14 Commands for synthetic read generation (bcftools v1.19, ART v2.5.8)

(example for chromosome 1, same commands for chromosome 6)

```
bcftools consensus -H R -f $input_fasta_chr1 $input_vcf_chr1 > $out_fasta1  
bcftools consensus -H A -f $input_fasta_chr1 $input_vcf_chr1 > $out_fasta2  
art_illumina -ss HS25 -sam -i $out_fasta1 -p -l 150 -f 19 -m 200 -s 10 -qs 30 -qs2 30 -o ${prefix1}  
art_illumina -ss HS25 -sam -i $out_fasta2 -p -l 150 -f 19 -m 200 -s 10 -qs 30 -qs2 30 -o ${prefix2}  
cat ${prefix1}.1.fq ${prefix2}.1.fq > $output_fq1  
cat ${prefix1}.2.fq ${prefix2}.2.fq > $output_fq2
```

## 3 Source code repository

minimap2\_index\_modifier repository is a fork of the original minimap2 repository (<https://github.com/lh3/minimap2>).

All functions from linked\_vcf\_list.c file are our contributions as well as read\_vcf, mm\_idx\_manipulate\_phased, add\_indel, add\_variants functions from sketch.c.

## 4 Algorithms

### Algorithm 4.1: Minimizer search for the reference genetic sequences

---

**Algorithm 3.1** Minimizer search for the reference genetic sequences

---

**Input:**  $w$  – window size,  $k$  – kmer length,  $s$  – sequence ( $|s| \geq w + k - 1$ )

**Output:**  $(w, k)$  – minimizers and their positions

```
1: function GETMINIMIZERS( $s, k, w$ )
2:    $M \leftarrow \emptyset$ 
3:   for  $i = 1$  to  $|s| - w - k - 1$  do           ▷ Find minimum value
4:      $m \leftarrow \infty$ 
5:     for  $j = 0$  to  $w - 1$  do
6:        $u \leftarrow s_i + j_k$ 
7:        $v \leftarrow \bar{s}_i + j_k$                  ▷  $\bar{s}$  – reversed strand
8:       if  $u \neq v$  then
9:          $m = \min(m, \min(u, v))$ 
10:      end if
11:    end for
12:    for  $j = 0$  to  $w - 1$  do                 ▷ Collect minimizers
13:       $u \leftarrow s_i + j_k$ 
14:       $v \leftarrow \bar{s}_i + j_k$ 
15:      if  $u < v$  and  $u = m$  then
16:         $M \leftarrow M \cup (m, i + j, 0)$ 
17:      end if
18:      if  $u > v$  and  $v = m$  then
19:         $M \leftarrow M \cup (m, i + j, 1)$ 
20:      end if
21:    end for
22:  end for
23:  return  $M$ 
24: end function
```

---

## Algorithm 4.2: Additional minimizer search for SNV

---

**Algorithm 3.2** Additional minimizer search for SNV

**Input:**  $w$  – window size,  $k$  – kmer length,  $s$  – sequence ( $|s| \geq 2 \cdot (w + k) - 1$ ),  
 $(var, pos)$  – variant and its position

**Output:**  $(w, k)$  – minimizers and their positions

```
1: function GETADDITIONALMINIMIZERS( $s, k, w, var, pos$ )
2:    $subs \leftarrow s[pos - k - w + 1] \dots s[pos + k + w - 1]$ 
3:    $subs[k + w - 1] \leftarrow var$  ▷ Modify sequence with SNV
4:    $M \leftarrow \emptyset$ 
5:   for  $i = 0$  to  $2 \cdot (w + k - 1)$  do ▷ Find minimum value
6:      $m \leftarrow \infty$ 
7:     for  $j = 0$  to  $w - 1$  do
8:        $u \leftarrow subs_i + j_k$ 
9:        $v \leftarrow \overline{subs}_i + j_k$  ▷  $\overline{subs}$  – reversed strand
10:      if  $u \neq v$  then
11:         $m = \min(m, \min(u, v))$ 
12:      end if
13:    end for
14:    for  $j = 0$  to  $w - 1$  do ▷ Collect minimizers
15:       $u \leftarrow subs_i + j_k$ 
16:       $v \leftarrow \overline{subs}_i + j_k$ 
17:      if  $u < v$  and  $u = m$  then
18:         $M \leftarrow M \cup (m, i + j, 0)$ 
19:      end if
20:      if  $u > v$  and  $v = m$  then
21:         $M \leftarrow M \cup (m, i + j, 1)$ 
22:      end if
23:    end for
24:  end for
25:  return  $M$ 
26: end function
```

---

### Algorithm 4.3: Searching valid combinations of SNVs in a window of length $k$

---

**Algorithm 3.3** Searching valid combinations of SNVs in a window of length  $k$

**Input:** *genotypes* – list of SNVs' genotypes, *begin\_ptr*, *end\_ptr* – pointers to SNVs in current window

**Output:** *Combs* – array of SNVs combinations in a window of length  $k$

```
1: function GETCOMBS(s, k, w)
2:   Combs  $\leftarrow \emptyset$ 
3:   Size  $\leftarrow \text{size}(\text{genotypes})$ 
4:   for  $i = 0$  to  $\text{Size} - 1$  do
5:     w_ptr  $\leftarrow \text{begin\_ptr}$ 
6:     CombsWithPos  $\leftarrow \emptyset$ 
7:     while  $w\_ptr \neq \text{end\_ptr}$  do
8:       if  $w\_ptr \rightarrow \text{genotypes}[i] = 0$  then
9:         CombsWithPos  $\cup (w\_ptr \rightarrow \text{allele}_{ref}, w\_ptr \rightarrow \text{pos})$ 
10:      end if
11:      if  $w\_ptr \rightarrow \text{genotypes}[i] = 1$  then
12:        CombsWithPos  $\cup (w\_ptr \rightarrow \text{allele}_{alt}, w\_ptr \rightarrow \text{pos})$ 
13:      end if
14:      w_ptr  $\leftarrow w\_ptr \rightarrow \text{next}$ 
15:    end while
16:    Combs  $\cup \text{CombsWithPos}$ 
17:  end for
18:  return Combs
19: end function
```

---
